# Supplementary material for: Non-Inflamed Tumor Microenvironment and Methylation/Downregulation of Antigen-Presenting Machineries in Cholangiocarcinoma
Source: Cancers (Basel). 2023 Apr 20;15(8):2379. doi: 10.3390/cancers15082379 (PMC10136850; doi:10.3390/cancers15082379)
Supplement: Supplementary file 1 [file cancers-15-02379-s001.zip › cancers-2301470-supplementary.xlsx]

## Sheet: CCA data used in this study
ID of TCGA	Clinicopathological background												TMB levels	mutation status																								gene expressions levels related to T-cell infiltration for TME classification (z-score)
	age	sex	stage	T	M	N	type	histological Grade	risk factor	fibrosis	mutation count	race		ARID1A	ARID2	AXIN1	CTNNB1	BRCA2	EZH2	FGFR1	FGFR2	FGFR3	IDH1	IDH2	KRAS	BAP1	NRAS	PTEN	RB1	SMAD4	TET1	TET2	TET3	TP53	HLA-A	HLA-B	HLA-C	CD3D	CD8A	CD8B	CD48	CD52	CD53	FYB1	IFNG	LAPTM5	LCP2	PTPRC	SLA
TCGA-3X-AAV9	72	Male	Stage I	T1	M0	N0	Cholangiocarcinoma	G2	Ulcerative colitis	0 - No Fibrosis	136	ASIAN	1.43333	WT	WT	WT	WT	WT	H282N	WT	WT	WT	WT	WT	WT	WT	WT	WT	WT	WT	WT	WT	WT	WT	WT	WT	WT	1.2433	1.7477	1.7246	1.292	1.1219	1.1075	1.4282	-0.1206	0.9655	1.3924	1.2827	1.637
TCGA-3X-AAVA	50	Female	Stage II	T2b	M0	NX	Intrahepatic Cholangiocarcinoma	G2	Diabetes mellitus|Smoking	1,2 - Portal Fibrosis	86	WHITE	1	WT	WT	WT	WT	WT	WT	WT	WT	WT	WT	R172S	WT	WT	WT	WT	WT	WT	WT	WT	WT	WT	WT	WT	WT	0.2288	0.472	0.3498	0.3235	0.3816	0.3368	0.0672	-0.442	0.1455	0.0807	0.3673	-0.1604
TCGA-3X-AAVB	70	Female	Stage IVB	T3	M1	N1	Extrahepatic Cholangiocarcinoma	G1	No History of Primary Risk Factors	NA	95	WHITE	1	WT	WT	WT	WT	WT	WT	WT	WT	WT	WT	WT	G12R	WT	WT	WT	WT	WT	WT	WT	WT	R248W	WT	WT	WT	0.2414	0.357	0.2633	0.1692	0.6197	0.6293	0.3952	0.3424	0.8107	0.1484	0.4586	0.8192
TCGA-3X-AAVC	72	Female	Stage I	T1	M0	N0	Perihilar Cholangiocarcinoma	G3	Other	1,2 - Portal Fibrosis	139	WHITE	1.73333	WT	WT	WT	WT	G1963W	WT	WT	WT	WT	WT	WT	WT	WT	WT	WT	WT	WT	WT	WT	WT	S241F	WT	WT	WT	0.4239	1.1105	0.7786	0.1445	0.0849	0.364	0.2635	0.9663	-0.1226	0.8931	0.4793	0.1906
TCGA-3X-AAVE	60	Male	Stage II	T2	M0	N0	Intrahepatic Cholangiocarcinoma	G2	Hepatitis B|Smoking	3,4 - Fibrous Speta	96	ASIAN	1.33333	WT	WT	WT	WT	WT	WT	WT	WT	WT	WT	WT	WT	N670Lfs*41	WT	WT	WT	WT	WT	WT	WT	WT	WT	WT	WT	0.8919	1.5022	1.1697	1.0391	0.8346	1.0221	1.5035	2.1047	1.1234	1.2853	1.2516	0.9254
TCGA-4G-AAZO	71	Female	Stage II	T2a	M0	N0	Intrahepatic Cholangiocarcinoma	G2	No History of Primary Risk Factors	1,2 - Portal Fibrosis	236	WHITE	1.33333	E2250Rfs*28	WT	WT	WT	WT	WT	WT	WT	WT	WT	WT	WT	E454Sfs*117	WT	WT	WT	WT	WT	WT	WT	WT	WT	WT	WT	-0.3413	0.0709	-0.106	0.2438	-0.3796	0.0498	0.0442	-0.8281	0.3092	-0.0971	0.0018	0.029
TCGA-4G-AAZT	62	Male	Stage I	T1	M0	N0	Intrahepatic Cholangiocarcinoma	G2	No History of Primary Risk Factors	1,2 - Portal Fibrosis	101	WHITE	2.83333	X1180_splice	WT	WT	WT	WT	WT	WT	WT	WT	WT	WT	WT	X262_splice T266P	WT	WT	WT	WT	WT	WT	WT	WT	WT	WT	WT	0.4475	-0.0068	0.3282	0.3379	0.5326	-0.756	-0.5692	-0.6495	0.58	-0.3495	-0.8226	-0.1485
TCGA-W5-AA2G	62	Female	Stage I	T1	M0	N0	Intrahepatic Cholangiocarcinoma	G3	No History of Primary Risk Factors	0 - No Fibrosis	124	WHITE	1.2	WT	WT	WT	WT	WT	WT	WT	WT	WT	R132C	WT	WT	WT	WT	WT	WT	WT	WT	WT	WT	WT	WT	E197K	WT	0.1763	-0.4134	-0.6473	0.4983	0.3331	0.3866	0.5701	0.7641	0.2497	0.6282	0.4298	-0.0078
TCGA-W5-AA2H	70	Female	Stage III	T3	M0	N0	Extrahepatic Cholangiocarcinoma	G3	No History of Primary Risk Factors	0 - No Fibrosis	64	WHITE	0.2	WT	WT	WT	WT	WT	WT	WT	WT	WT	WT	WT	WT	WT	WT	WT	WT	WT	WT	WT	WT	WT	WT	WT	WT	2.7765	1.9585	2.1665	3.2226	3.4677	3.014	2.3307	1.6111	3.2261	2.4134	2.2858	2.758
TCGA-W5-AA2I	66	Male	Stage I	T1	M0	N0	Intrahepatic Cholangiocarcinoma	G2	No History of Primary Risk Factors	0 - No Fibrosis	106	WHITE	3.16667	WT	WT	WT	WT	WT	WT	WT	WT	WT	WT	WT	WT	WT	WT	WT	WT	WT	WT	WT	WT	C141R	WT	WT	WT	-0.4993	-0.5285	-0.1797	-0.5501	-0.107	-1.5531	-1.3076	-0.9805	-1.2699	-1.9269	-2.3172	-1.7126
TCGA-W5-AA2O	57	Male	Stage I	T1	M0	N0	Intrahepatic Cholangiocarcinoma	G3	Smoking	0 - No Fibrosis	110	WHITE	1.63333	WT	WT	WT	WT	WT	WT	WT	WT	WT	R132C	WT	WT	WT	WT	WT	WT	WT	WT	WT	WT	Y234* M237Gfs*20	WT	A329V	WT	-1.2398	-1.188	-1.0627	-0.4999	0.0167	0.0561	-0.5547	-1.4602	0.1409	-0.6081	-0.4292	-0.3424
TCGA-W5-AA2Q	68	Male	Stage II	T2b	M0	N0	Intrahepatic Cholangiocarcinoma	G2	Smoking	1,2 - Portal Fibrosis	128	WHITE	3.1	WT	WT	WT	WT	WT	WT	WT	FGFR2-SHTN1	WT	WT	WT	WT	WT	WT	WT	WT	WT	WT	WT	WT	WT	WT	WT	WT	-1.1391	-0.9454	-0.8536	-1.0596	-1.0531	-1.3206	-1.2611	-1.4602	-1.7317	-0.9281	-0.7724	-1.6942
TCGA-W5-AA2R	77	Female	Stage I	T1	M0	N0	Intrahepatic Cholangiocarcinoma	G3	Smoking	0 - No Fibrosis	102	WHITE	1.46667	WT	WT	WT	WT	WT	WT	WT	WT	WT	WT	WT	WT	WT	WT	WT	WT	WT	WT	WT	WT	WT	R7G	WT	WT	1.0105	1.2247	1.1743	1.0796	0.9402	1.1186	1.4562	1.5433	0.8332	1.3398	1.3701	1.206
TCGA-W5-AA2T	64	Female	Stage II	T2	M0	N0	Intrahepatic Cholangiocarcinoma	G3	Smoking	0 - No Fibrosis	83	WHITE	2	WT	WT	WT	WT	WT	WT	WT	WT	WT	WT	WT	WT	WT	WT	WT	WT	WT	WT	WT	WT	WT	WT	WT	WT	-0.7724	-0.0807	-0.5534	-1.0783	-1.0523	-1.4705	-1.5786	-1.0576	-1.4248	-1.6132	-1.3938	-1.2617
TCGA-W5-AA2U	78	Female	Stage I	T1	M0	N0	Intrahepatic Cholangiocarcinoma	G3	Smoking	0 - No Fibrosis	152	WHITE	4.7	WT	WT	WT	WT	WT	WT	WT	WT	WT	WT	WT	WT	WT	WT	WT	WT	WT	WT	WT	WT	WT	WT	WT	WT	-0.1123	0.1277	-0.0479	0.0941	0.1647	0.1407	0.1992	0.0955	-0.3619	-0.0145	0.3365	0.3469
TCGA-W5-AA2W	31	Female	Stage IVA	T2a	M0	N1	Intrahepatic Cholangiocarcinoma	G3	No History of Primary Risk Factors	0 - No Fibrosis	87	WHITE	1	WT	WT	WT	WT	WT	WT	WT	FGFR2-BICC1	WT	WT	WT	WT	K249*	WT	WT	WT	WT	WT	WT	WT	WT	WT	WT	WT	0.1282	0.7754	0.7735	0.0174	-0.1325	-0.1263	0.2816	0.0021	-0.206	-0.2703	0.2406	0.1386
TCGA-W5-AA2X	67	Male	Stage IVB	T2b	M1	N1	Perihilar Cholangiocarcinoma	G4	No History of Primary Risk Factors	1,2 - Portal Fibrosis	140	WHITE	3.8	WT	WT	WT	WT	WT	WT	WT	WT	WT	WT	WT	WT	WT	WT	WT	WT	WT	WT	WT	WT	WT	WT	WT	WT	-1.4887	-1.5879	1.5491	-1.6808	-1.3009	-1.0548	-1.2072	-1.0399	-1.2905	-1.8224	-1.2802	-1.1325
TCGA-W5-AA2Z	29	Female	Stage II	T2	M0	N0	Intrahepatic Cholangiocarcinoma	G3	No History of Primary Risk Factors	1,2 - Portal Fibrosis	79	WHITE	0.833333	WT	WT	WT	WT	WT	WT	WT	DNM1-FGFR2 FGFR2-CCDC186	WT	WT	WT	WT	WT	WT	WT	WT	WT	WT	WT	WT	WT	WT	WT	WT	0.0152	-0.6433	-1.2374	-0.5188	-0.2154	0.1127	0.4531	-1.4602	-0.1279	0.3229	0.1522	0.2642
TCGA-W5-AA30	82	Male	Stage I	T1	M0	N0	Intrahepatic Cholangiocarcinoma	G3	Smoking	0 - No Fibrosis	129	WHITE	3.46667	WT	WT	WT	WT	E1514Q	WT	WT	WT	WT	WT	WT	WT	WT	WT	WT	WT	WT	WT	WT	WT	WT	WT	WT	WT	0.4055	0.837	0.5412	0.6396	0.3909	0.3683	0.4979	0.1618	0.2083	0.6312	0.5563	0.3492
TCGA-W5-AA31	71	Male	Stage I	T1	M0	N0	Intrahepatic Cholangiocarcinoma	G3	No History of Primary Risk Factors	0 - No Fibrosis	110	WHITE	2.7	WT	WT	WT	WT	WT	WT	WT	WT	WT	WT	WT	WT	W196*	WT	WT	WT	WT	WT	WT	WT	WT	WT	A329V	WT	-0.3646	-0.8676	-1.0211	0.0708	-0.4113	0.0893	0.1909	-1.1391	-0.2116	0.2615	0.2534	-0.3307
TCGA-W5-AA33	60	Male	Stage I	T1	M0	N0	Intrahepatic Cholangiocarcinoma	G3	No History of Primary Risk Factors	0 - No Fibrosis	71	WHITE	1.9	WT	WT	WT	WT	WT	WT	WT	WT	WT	WT	WT	WT	WT	WT	WT	WT	WT	WT	WT	WT	WT	WT	WT	WT	0.6492	0.7396	0.6969	0.9917	0.7084	0.8069	1.139	-1.0643	0.4592	0.8143	1.2407	1.3471
TCGA-W5-AA34	75	Female	Stage I	T1	M0	N0	Intrahepatic Cholangiocarcinoma	G2	No History of Primary Risk Factors	0 - No Fibrosis	117	WHITE	2.2	WT	WT	WT	WT	WT	WT	WT	F276C	WT	R132C	WT	WT	WT	WT	WT	WT	WT	WT	WT	S1174C	WT	WT	WT	WT	-0.2493	-0.5297	-0.8402	-0.3269	0.1752	-0.0445	-0.6022	-0.164	-0.113	-0.3893	-0.518	-0.0041
TCGA-W5-AA36	51	Female	Stage IV	T3	M1	N0	Perihilar Cholangiocarcinoma	G3	No History of Primary Risk Factors	0 - No Fibrosis		WHITE	1.46667	WT	WT	WT	WT	WT	WT	WT	Y375C	WT	R132S	WT	WT	WT	WT	WT	WT	WT	WT	WT	WT	WT	WT	WT	WT	-0.2509	-0.358	-0.5157	-0.1021	-0.1524	-0.3755	-0.7143	-0.242	0.2259	-0.2046	-0.8671	-0.7461
TCGA-W5-AA38	55	Female	Stage I	T1	M0	N0	Intrahepatic Cholangiocarcinoma	G3	No History of Primary Risk Factors	1,2 - Portal Fibrosis	110	WHITE	0.966667	WT	WT	WT	WT	WT	WT	WT	WT	WT	WT	WT	WT	WT	WT	WT	WT	WT	WT	WT	WT	WT	WT	WT	WT	-0.4973	-0.6447	-0.3802	-0.2971	-0.1876	-0.2771	-0.4646	-1.4602	0.066	-0.5204	-0.6997	-0.7533
TCGA-W5-AA39	81	Male	Stage II	T2	M0	N0	Intrahepatic Cholangiocarcinoma	G4	No History of Primary Risk Factors	0 - No Fibrosis	748	WHITE	21.8333	WT	WT	WT	WT	WT	WT	WT	WT	WT	WT	WT	WT	F118V	WT	L320* L320V	WT	WT	WT	WT	WT	WT	WT	WT	WT	-1.9456	-1.3449	-0.6263	-1.9214	-1.5159	-1.887	-1.815	-1.4602	-1.6543	-1.9536	-1.4783	-1.3854
TCGA-W6-AA0S	46	Female	Stage I	T1	MX	N0	Intrahepatic Cholangiocarcinoma	G2	Diabetes mellitus|Non-Alcoholic Fatty Liver Disease	1,2 - Portal Fibrosis	100	WHITE	1.23333	WT	WT	WT	WT	WT	WT	WT	WT	WT	WT	R172K	WT	WT	WT	WT	WT	WT	WT	WT	WT	WT	WT	WT	WT	-0.045	0.2475	-0.2257	-0.0499	0.1482	0.7544	0.1952	-0.7805	1.1183	0.1051	0.7621	0.6018
TCGA-WD-A7RX	71	Female	Stage II	T2b	MX	NX	Intrahepatic Cholangiocarcinoma	G2	Cirrhosis|Diabetes mellitus|Smoking	3,4 - Fibrous Speta	111	WHITE	0.966667	S1558Cfs*11 Q1363K	WT	WT	WT	WT	WT	WT	WT	WT	WT	WT	WT	WT	WT	WT	WT	WT	WT	WT	WT	WT	WT	WT	WT	1.2456	1.2147	1.1725	1.3379	1.556	1.0214	1.1276	1.5842	0.7563	1.1636	1.129	0.9419
TCGA-YR-A95A	52	Male	Stage IV	T2	M1	NX	Perihilar Cholangiocarcinoma	G2	No History of Primary Risk Factors	NA	96	WHITE	0.9	N1571*	WT	WT	WT	WT	WT	WT	WT	WT	R132C	WT	WT	WT	WT	WT	WT	WT	WT	WT	WT	WT	WT	A329V	WT	0.0943	0.4063	-0.0286	0.0478	-0.0535	-0.4016	-0.1125	0.7878	-0.6666	-0.0473	-0.2499	-0.8046
TCGA-ZD-A8I3	73	Female	Stage II	T2	M0	N0	Intrahepatic Cholangiocarcinoma	G3	No History of Primary Risk Factors	NA	104	ASIAN	1.16667	G1556Pfs*12	WT	WT	WT	WT	WT	WT	WT	WT	WT	WT	WT	WT	WT	WT	WT	WT	WT	WT	WT	WT	WT	WT	WT	-1.0319	-0.6494	-1.2837	-0.6684	-0.8201	-0.8735	-0.8423	-0.7686	-1.0102	-0.6276	-1.0175	-1.2224
TCGA-ZH-A8Y1	74	Female	Stage IVA	T3	M0	N1	Intrahepatic Cholangiocarcinoma	G2	Smoking	NA	80	WHITE	1.26667	WT	WT	WT	WT	WT	WT	WT	FGFR2-FRK	WT	WT	WT	WT	WT	WT	WT	WT	WT	WT	WT	WT	WT	WT	WT	WT	-0.9168	-1.199	-1.1205	-0.5231	-0.6334	-0.1433	-0.1934	-1.0055	0.1084	0.349	-0.0638	-0.1133
TCGA-ZH-A8Y2	59	Female	Stage I	T1	M0	NX	Intrahepatic Cholangiocarcinoma	G2	No History of Primary Risk Factors	NA	121	BLACK OR AFRICAN AMERICAN	1.6	WT	WT	WT	WT	WT	WT	WT	WT	WT	WT	WT	WT	L49P	WT	WT	WT	WT	WT	WT	WT	WT	WT	A182V	WT	-0.6147	-0.7005	0.7673	-0.2007	-0.682	0.2572	0.4696	-1.0306	-0.0529	0.3264	0.2179	0.4761
TCGA-ZH-A8Y4	58	Male	Stage I	T1	M0	N0	Intrahepatic Cholangiocarcinoma	G3	Diabetes mellitus|Smoking	NA	129	WHITE	2	WT	WT	WT	WT	WT	WT	WT	WT	WT	WT	WT	WT	D608Afs*9	WT	WT	WT	WT	WT	WT	WT	WT	WT	WT	WT	-0.9632	-0.451	-1.196	-0.7156	-0.7279	-0.4093	0.0591	-1.4602	-0.4743	-0.3853	-0.3169	-0.0319
TCGA-ZH-A8Y5	69	Male	Stage IVB	T3	M1	N1	Intrahepatic Cholangiocarcinoma	G3	Smoking	NA	82	WHITE	0.733333	WT	P1144S	WT	WT	WT	WT	WT	FGFR2-BICC1	WT	WT	WT	WT	WT	WT	WT	WT	WT	WT	WT	WT	C124Y	WT	WT	WT	-1.4331	-1.0814	-1.652	-1.7763	-1.9425	-1.8645	-1.996	-1.4602	-1.6836	-1.2419	-1.4644	-1.3819
TCGA-ZH-A8Y6	41	Female	Stage I	T1	M0	N0	Intrahepatic Cholangiocarcinoma	G2	No History of Primary Risk Factors	NA	138	BLACK OR AFRICAN AMERICAN	1.26667	WT	WT	WT	WT	WT	WT	WT	WT	WT	WT	WT	WT	WT	WT	WT	WT	WT	WT	WT	WT	WT	WT	WT	WT	2.2471	-1.6528	-1.4946	-1.3638	-1.7136	-1.1984	-1.2271	-1.4602	-1.0586	-1.0325	-1.1565	-0.8295
TCGA-ZH-A8Y8	73	Male	Stage I	T1	M0	N0	Intrahepatic Cholangiocarcinoma	G2	No History of Primary Risk Factors	NA	116	WHITE	1.06667	WT	WT	WT	WT	WT	WT	WT	WT	WT	WT	WT	Q61K	WT	WT	WT	WT	WT	WT	WT	WT	WT	WT	WT	WT	0.5234	-0.0761	-0.0779	1.22	1.2063	0.9644	0.7078	-0.4683	0.806	0.4526	1.1947	0.6561
TCGA-ZU-A8S4	52	Male	Stage I	T1	MX	NX	Intrahepatic Cholangiocarcinoma	G3	No History of Primary Risk Factors	0 - No Fibrosis	106	WHITE	3.06667	WT	WT	WT	WT	V1663I	WT	WT	WT	WT	WT	WT	WT	WT	WT	WT	WT	WT	WT	WT	WT	WT	WT	WT	WT	1.1564	2.1574	1.6951	0.5632	0.3984	1.1559	1.066	1.818	1.328	1.425	0.8371	1.3761
[truncated: 32 more columns]
